# Supplementary material for: Mediator-Related Symptoms and Anaphylaxis in Children with Mastocytosis
Source: Preprints.org preprint supplement (doi:10.20944/preprints202102.0015.v1), 2021-02-01
Supplement: Supplementary file 1 [file supplementary]

**Table 1: Risk factors for anaphylaxis in children with mastocytosis (adapted from (102))**

| Criterion                          | Risk factor outcome                                      | Study                     |
|------------------------------------|----------------------------------------------------------|---------------------------|
| Extent and density of skin lesions | Anaphylaxis in those with extent > 45% and density > 15% | Brockow et al. (42)       |
| Serum tryptase                     | Significantly elevated in patients with anaphylaxis      | Brockow et al. (42)       |
|                                    | Correlation with severity                                | Alvarez-Twose et al. (13) |
| Skin involvement                   | > 90%: risk factor for hospitalization*                  | Alvarez-Twose et al. (13) |
| Blistering                         | Risk factor for hospitalization*                         | Brockow et al. (15)       |
| Diffuse cutaneous mastocytosis     | Risk factor for hospitalization*                         | Alvarez-Twose et al. (13) |

\* Hospitalization because of severe mast cell activation episodes

**Table 2. Frequency of anaphylaxis in children with mastocytosis in the literature**

| Study*                  | Year | No         | Frequency        | Elicitors                                                      |
|-------------------------|------|------------|------------------|----------------------------------------------------------------|
| Gonzales (45)           | 2007 | 47         | 3 (6.4%)         | Food, idiopathic                                               |
| Brockow (42)            | 2008 | 46         | 4 (9%)           | Food, vaccination, cold water, idiopathic                      |
| Alvarez-Twose (13)      | 2012 | 111        | 4 (3.6%)         | Heat, skin rubbing, fever                                      |
| Lange (35)              | 2013 | 101        | 7 (7%)           | Clindamycin, ketamine, gadolinium contrast, stress, idiopathic |
| Barnes (14)             | 2014 | 67         | 1 (1.5%)         | NA                                                             |
| Matito (55)             | 2015 | 48         | 1 (2.0%)         | Perioperative                                                  |
| Lange (38)              | 2017 | 102        | 2 (2%)           | Ketamine, idiopathic                                           |
| Heinze (43)             | 2017 | 43         | 0 (0%)           | NA                                                             |
| <b>Studies combined</b> |      | <b>565</b> | <b>22 (3.9%)</b> |                                                                |

\*First authors; NA= not available.
